# Supplementary material for: Boosting the hydrogen evolution reaction activity of Ru in alkaline and neutral media by accelerating water dissociation
Source: Royal Society of Chemistry journal article supplement (doi:10.1039/d0ra09515j), 2021-01-01
Supplement: d0ra09515j1.pdf [file d0ra09515j1.pdf]

Electronic Supplementary Material (ESI) for RSC Advances.  
This journal is © The Royal Society of Chemistry 2019.

## Electronic Supplementary Information

### **Boosting the Hydrogen Evolution Reaction Activity of Ru in Alkaline and Neutral Media by Accelerating Water Dissociation**

Lin Tang, Junjie Yu, Yang Zhang, Zaozao Tang, and Yong Qin<sup>\*</sup>

<sup>a</sup> Jiangsu Key Laboratory of Advanced Materials and Technology, School of Petrochemical Engineering, Changzhou University, Changzhou, Jiangsu, 213164, China. E-mail: qinyong@cczu.edu.cn

\*Corresponding authors:

E-mail: qinyong@cczu.edu.cn

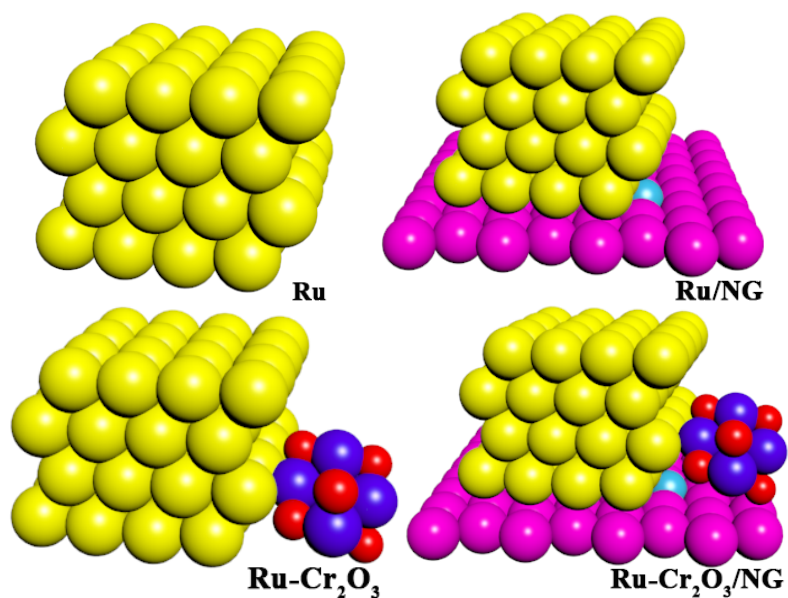

**Fig. S1** Surface configuration of the four different catalysts used for the calculation

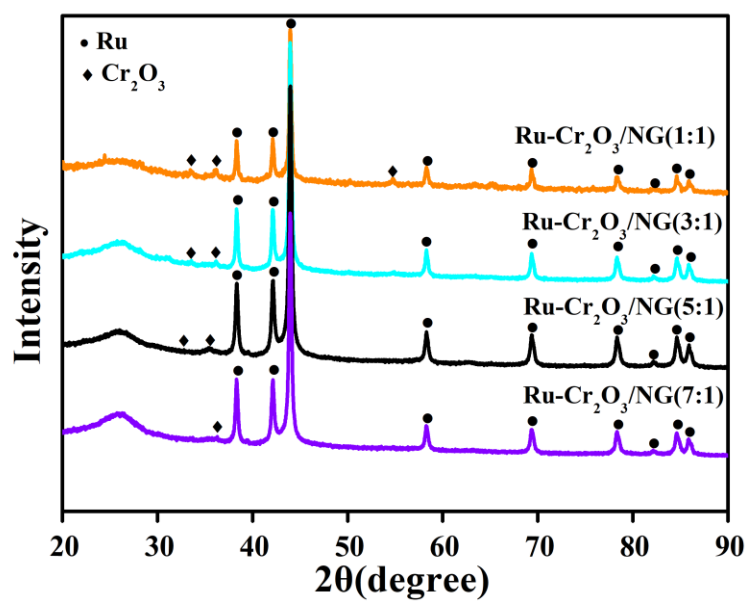

**Fig. S2** XRD pattern of the Ru and Cr<sub>2</sub>O<sub>3</sub> with different molar ratios in Ru-Cr<sub>2</sub>O<sub>3</sub>/NG.

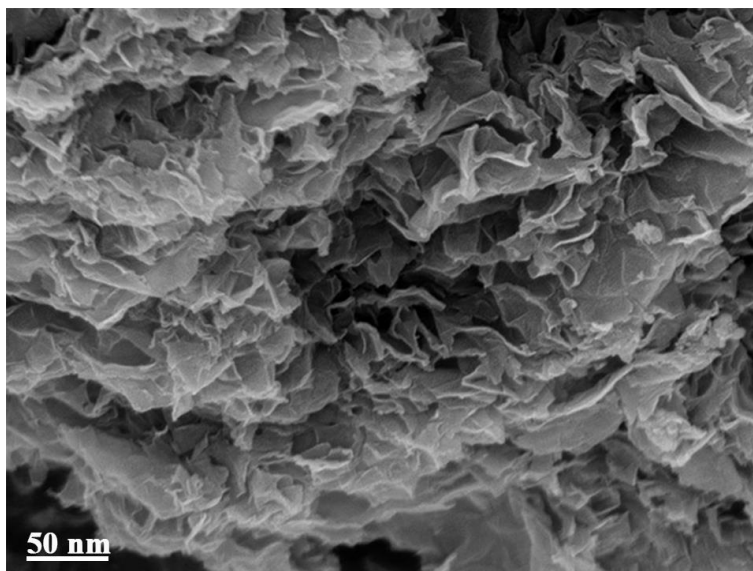

Fig. S3 SEM image of Ru-Cr<sub>2</sub>O<sub>3</sub>/NG.

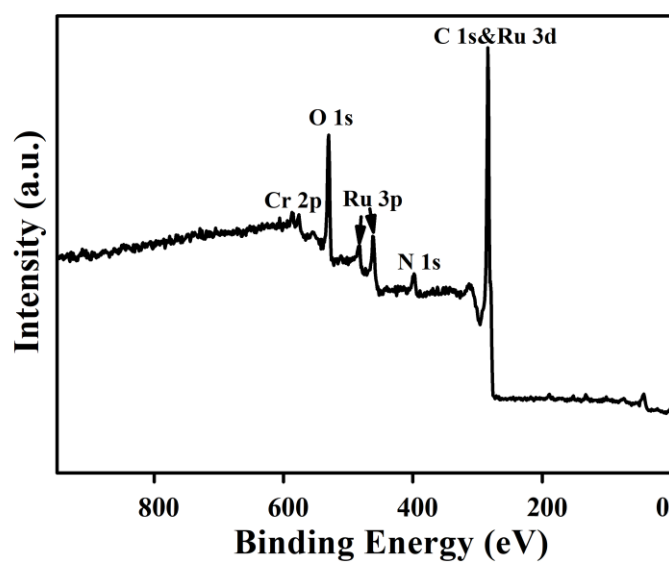

Fig. S4 XPS survey of Ru-Cr<sub>2</sub>O<sub>3</sub>/NG.

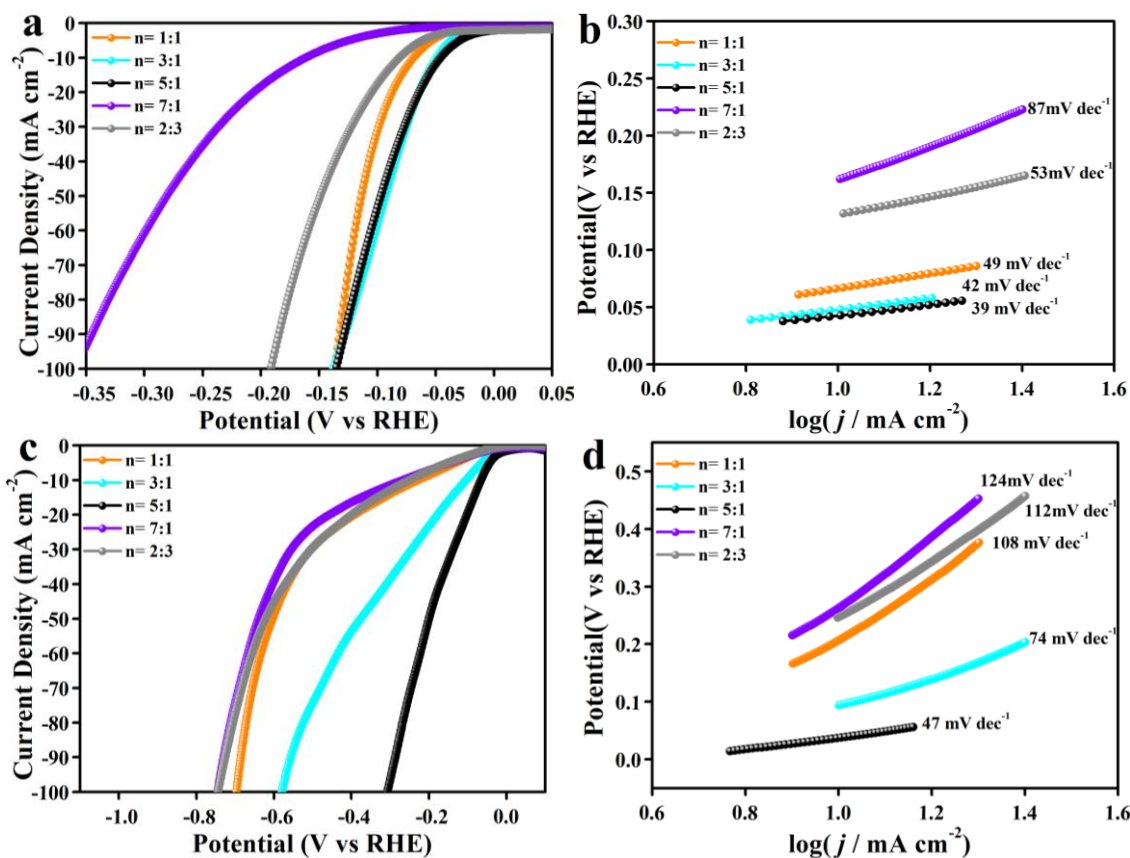

**Fig. S5** The electrocatalytic performance of Ru and  $\text{Cr}_2\text{O}_3$  with different molar ratios in Ru- $\text{Cr}_2\text{O}_3/\text{NG}$  for HER in alkaline (1 M KOH) (a, b) and neutral medium (1 M PBS) (c, d). LSV curves (a, c); Tafel plots (b, d);  $n$  is the molar ratio of Ru to  $\text{Cr}_2\text{O}_3$ .

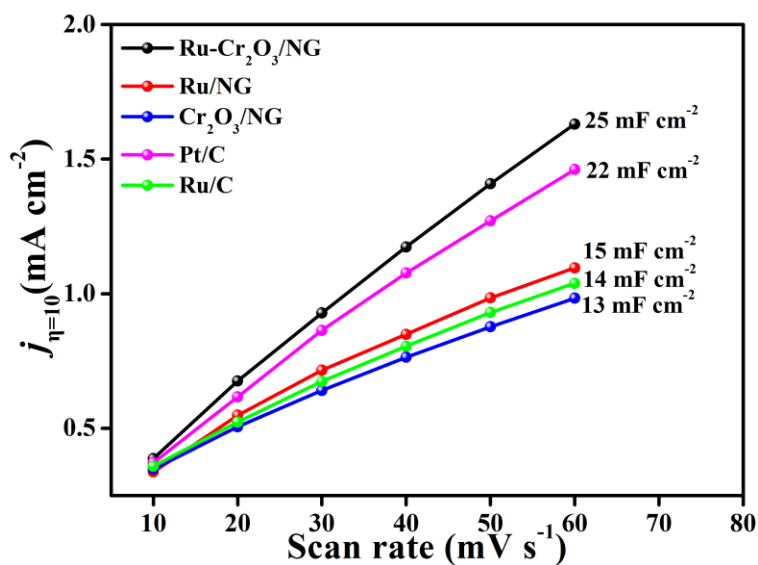

**Fig. S6** The ECSA of the catalysts estimated by a double layer capacitance ( $C_{dl}$ ) measurement.

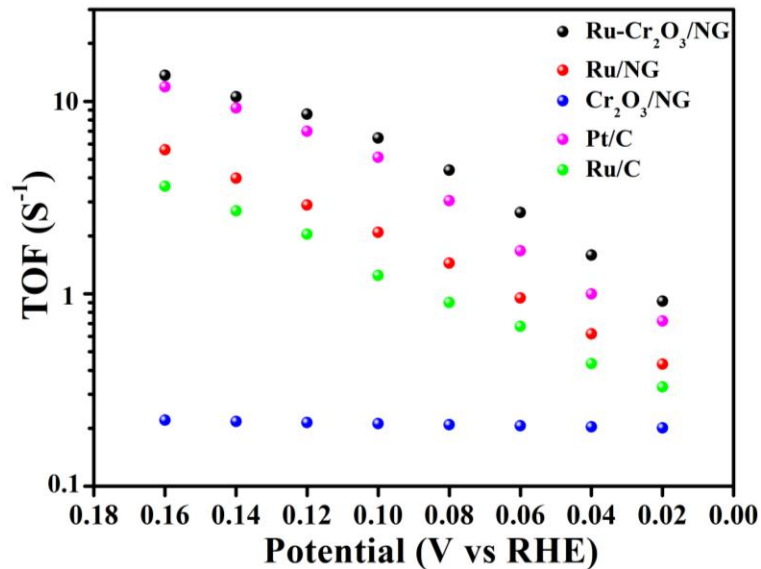

**Fig. S7** TOF of Ru and Cr<sub>2</sub>O<sub>3</sub> with different molar ratios in Ru-Cr<sub>2</sub>O<sub>3</sub>/NG, Ru/NG, Cr<sub>2</sub>O<sub>3</sub>/NG, 20 wt.% Pt/C and Ru/C in alkaline medium (1.0 M KOH).

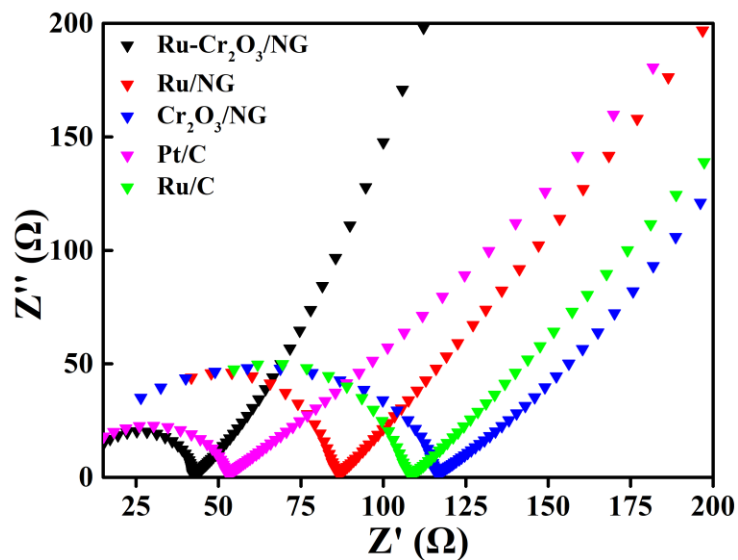

**Fig. S8** The comparison of the EIS of Ru-Cr<sub>2</sub>O<sub>3</sub>/NG, Ru/NG, Cr<sub>2</sub>O<sub>3</sub>/NG, 20 wt.% Pt/C and Ru/C.

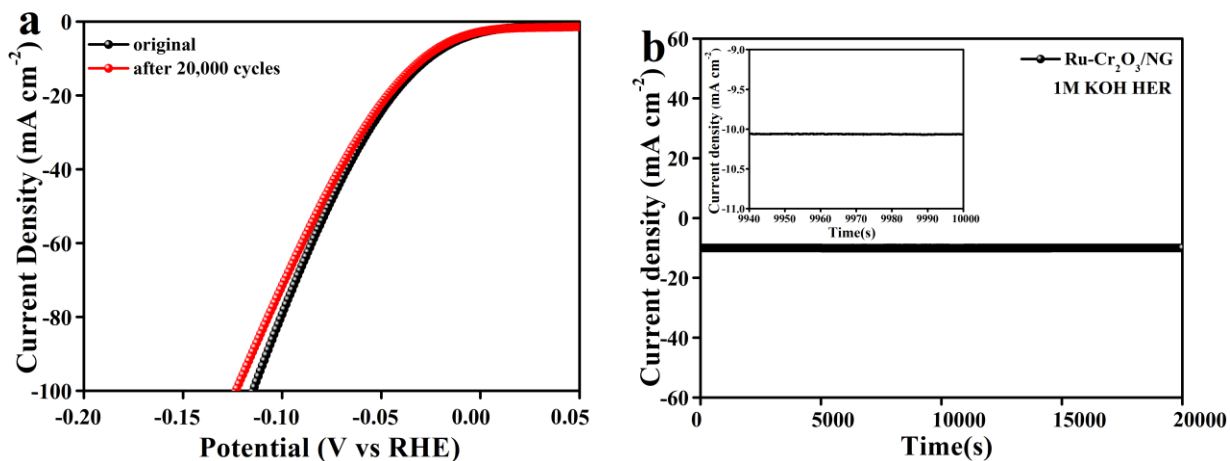

**Fig. S9** The LSV curves of Ru-Cr<sub>2</sub>O<sub>3</sub>/NG over 20000 cycles (a) and the I-t curves of Ru-Cr<sub>2</sub>O<sub>3</sub>/NG (b) in alkaline medium (1.0 M KOH) at -1.073V.

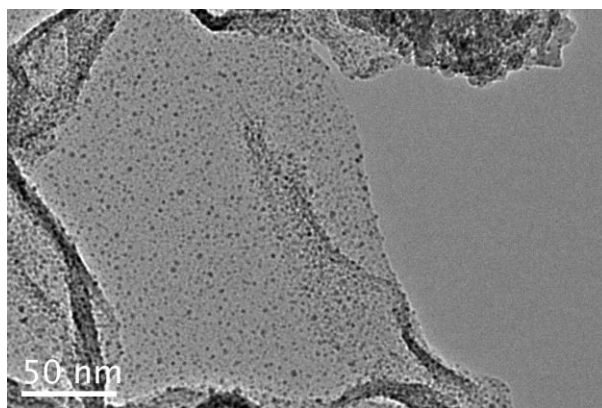

**Fig. S10** TEM images of Ru-Cr<sub>2</sub>O<sub>3</sub>/NG after long-term test.

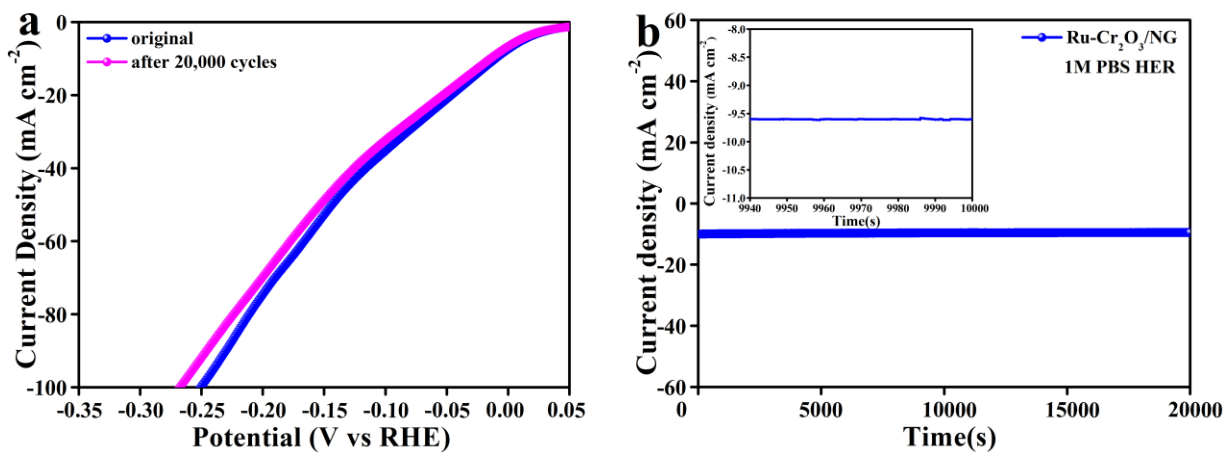

**Fig. S11** The LSV curves of Ru-Cr<sub>2</sub>O<sub>3</sub>/NG over 20000 cycles (a) and the I-t curves of Ru-Cr<sub>2</sub>O<sub>3</sub>/NG (b) in neutral medium (1.0 M PBS) at -0.652V.

**Tab. S1** The mass content of Ru and Cr<sub>2</sub>O<sub>3</sub> on the NG

| catalyst \ wt.%                       | Ru   | Cr <sub>2</sub> O <sub>3</sub> |
|---------------------------------------|------|--------------------------------|
| Ru-Cr <sub>2</sub> O <sub>3</sub> /NG | 17.0 | 1.8                            |
| Ru/NG                                 | 19.6 | 0                              |
| Cr <sub>2</sub> O <sub>3</sub> /NG    | 0    | 18.9                           |
| Ru/C                                  | 19.3 | 0                              |

**Tab. S2** Comparison of HER performance in alkaline/neutral media for Ru, Cr<sub>2</sub>O<sub>3</sub>/NG with other HER electrocatalysts.

| Catalysts                              | Electrolytes<br>/(pH) | $\eta_{10}$<br>(mV) | Tafel slope<br>(mV dec <sup>-1</sup> ) | TOF <sup>a</sup><br>(s <sup>-1</sup> ) | Catalyst<br>loading<br>(mg cm <sup>-2</sup> ) | Ref.         |
|----------------------------------------|-----------------------|---------------------|----------------------------------------|----------------------------------------|-----------------------------------------------|--------------|
| Ru, Cr <sub>2</sub> O <sub>3</sub> /NG | 1 M KOH               | 47                  | 39                                     | 6.4                                    | 0.86                                          | This<br>work |
|                                        | 1 M PBS               | 53                  | 47                                     | -                                      |                                               |              |
| Ru/C <sub>3</sub> N <sub>4</sub> /C    | 0.1 M KOH             | 79                  | -                                      | 4.2                                    | 0.204                                         | [1]          |
| Ru/C-TiO <sub>2</sub>                  | 1 M KOH               | 44                  | 73.7                                   | 0.0223 <sup>b</sup>                    | 0.2                                           | [2]          |
| Ru/MEOH/THF                            | 0.1 M PBS             | 83                  | 80                                     | 0.87                                   | -                                             | [3]          |
| CoP@BCN                                | 1 M KOH               | 122                 | 59                                     | -                                      | 0.4                                           | [4]          |
|                                        | 1 M PBS               | 215                 | 52                                     | -                                      |                                               |              |
| Ru/NC                                  | 1 M KOH               | 17                  | 32                                     | 10.2                                   | 0.24                                          | [5]          |
| RuP <sub>2</sub> @NPC                  | 1 M KOH               | 52                  | 69                                     | -                                      | 1.0                                           | [6]          |
|                                        | 1 M PBS               | 57                  | 87                                     | -                                      |                                               |              |
| Mo <sub>2</sub> C@2D-NPC               | 1 M KOH               | 45                  | 46                                     | -                                      | 0.247                                         | [7]          |
| MoP <sub>2</sub> NS/CC                 | 1 M KOH               | 67                  | 70                                     | -                                      | 7.8                                           | [8]          |
|                                        | 1 M PBS               | 85                  | 98.3                                   | -                                      |                                               |              |
| CoP/CC                                 | 1 M KOH               | 209                 | 129                                    | -                                      | 0.92                                          | [9]          |
|                                        | 1 M PBS               | 106                 | 93                                     | -                                      |                                               |              |
| Rh <sub>2</sub> P                      | 1 M KOH               | 30                  | 50                                     | -                                      | 0.15                                          | [10]         |
|                                        | 1 M PBS               | 38                  | 46                                     | -                                      |                                               |              |

<sup>a</sup> The values are calculated based on overpotential of 100 mV, except that b is at an overpotential of 150mV.



**Tab. S3** Binding energies of H<sup>+</sup> and OH<sup>-</sup> on various surfaces

| Surface                               | $\Delta E_H$ (eV) | $\Delta E_{OH}$ (eV) |
|---------------------------------------|-------------------|----------------------|
| Ru                                    | -0.15             | 0.20                 |
| Ru/NG                                 | -1.18             | -0.88                |
| Ru/Cr <sub>2</sub> O <sub>3</sub>     | -1.64             | -1.26                |
| Ru-Cr <sub>2</sub> O <sub>3</sub> /NG | -1.82             | -2.05                |

## References

- [1] Y. Zheng, Y. Jiao, Y. Zhu, L. H. Li, Y. Han, Y. Chen, M. Jaroniec and S. Qiao, *J. Am. Chem. Soc.*, 2016, **138**, 16174.
- [2] Y. J. Wang, Q. X. Zhu, T. P. Xie, Y. Peng, S.L. Liu and J. K. Wang, *Chem. Electro. Chem.*, 2020, **7**, 1182.
- [3] S. Drouet, J. Creus, V. Colli ère, C. Amiens, J. Garc ía-Ant ón, X. Sala and K. Philippot, *Chem. Commun.*, 2017, **53**, 11713.
- [4] H. Tabassum, W. Guo, W. Meng, A. Mahmood, R. Zhao, Q. F. Wang and R. Q. Zou, *Adv. Energy Mater.*, 2017, **7**, 1601671.
- [5] J. W. Liu, G. Z. Ding, J. Y. Yu, X. G. Liu, X. F. Zhang, J. J Guo, J. C. Zhang, W. Renc and R. C. Che, *J. Mater. Chem. A.*, 2019, **7**, 18072.
- [6] Z. H. Pu, I. S. Amiinu, Z. K. Kou, W. Q. Li and S. C. Mu, *Angew. Chem. Int. Ed.*, 2017, **56**, 11559.
- [7] C. Lu, D. Tranca, J. Zhang, F. R. Hern ández, Y. Su, X. Zhuang, F. Zhang, G. Seifert and X. Feng, *ACS Nano.*, 2017, **11**, 3933.
- [8] W. Zhu, C. Tang, D. Liu, J. Wang, A. Asiric and X. Sun, *J. Mater. Chem. A.*, 2016, **4**, 7169.
- [9] J. Q. Tian, Q. Liu, A. M. Asiri and X. P. Sun, *J. Am. Chem. Soc.*, 2014, **136**, 7587.
- [10] F. L. Yang, Y. M. Zhao, Y. S. Du, Y. T. Chen, G. Z. Cheng, S. L. Chen and W. Luo, *Adv. Energy Mater.*, 2018, **8**, 1703489.
